# Supplementary material
Source: Springer Nature journal article supplement (https://www.springermedizin.de/resource/supplementary/12881_2007_350_MOESM5_ESM.pdf/9452978)

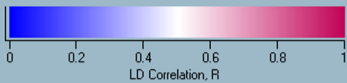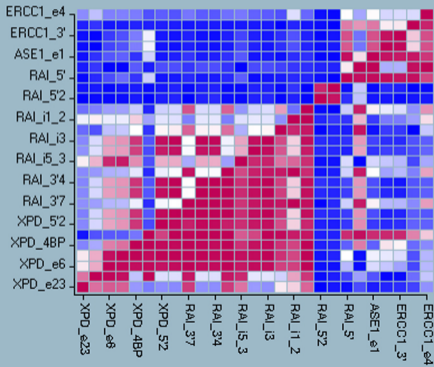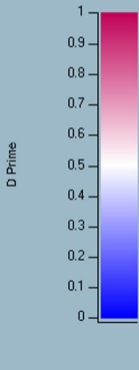

Supplement: MOESM5 [file 9452978]
